# Supplementary figures and images for: Integrated taxonomy: traditional approach and DNA barcoding for the identification of filarioid worms and related parasites (Nematoda)
Source: Springer Nature journal article supplement (doi:10.1186/1742-9994-6-1), 2009-01-07

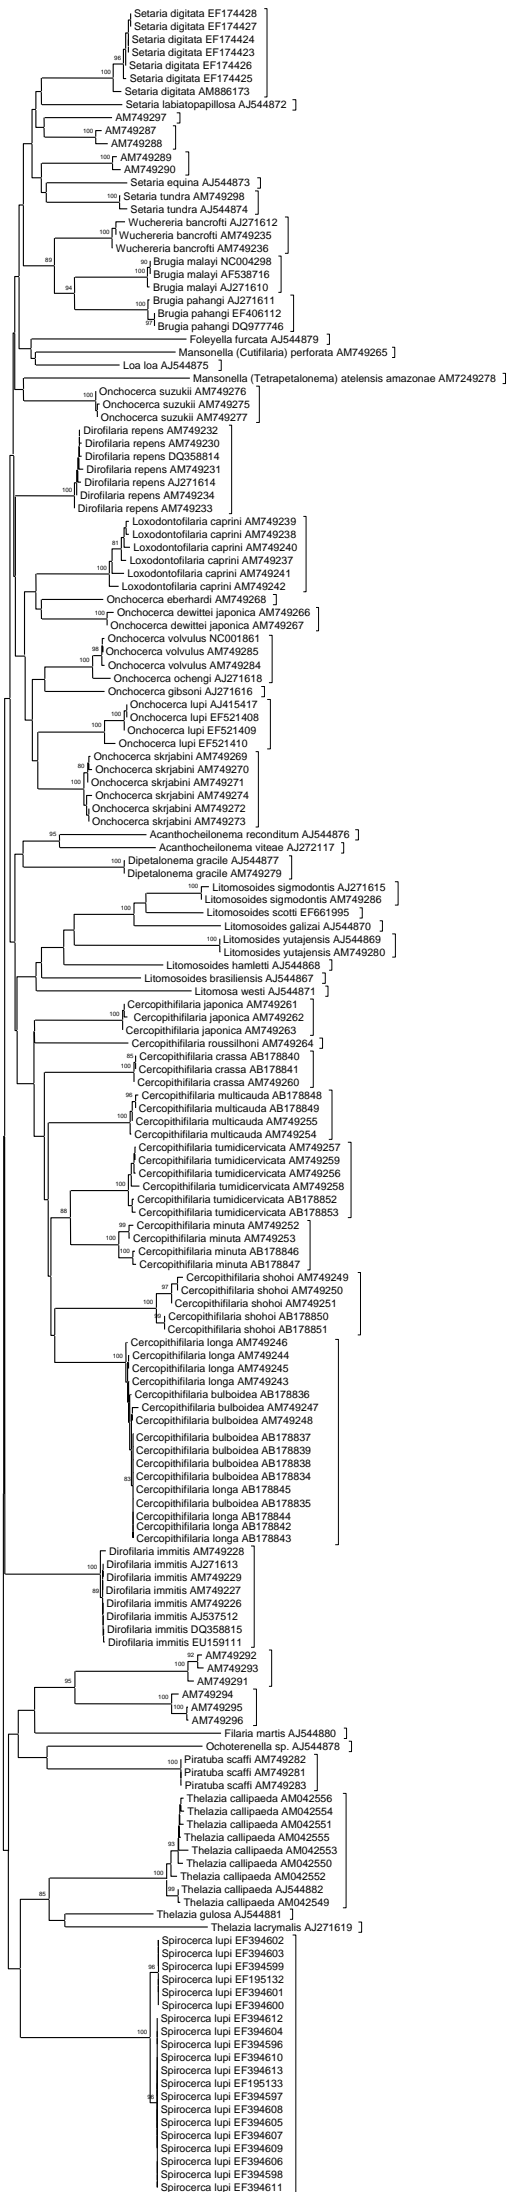

Supplement: Additional file 3 [file 1742-9994-6-1-S3.pdf]
